# Supplementary material for: NAT10 recruits PABP to compartmentalize ac4C-modified mRNAs into stress granules and enhance mRNA stability during plant heat thermotolerance
Source: Research Square preprint supplement (doi:10.21203/rs.3.rs-6415425/v1), 2025-06-17
Supplement: Supplementary file 1 [file 022f8ac72bcf26d7ce034afc.pdf]

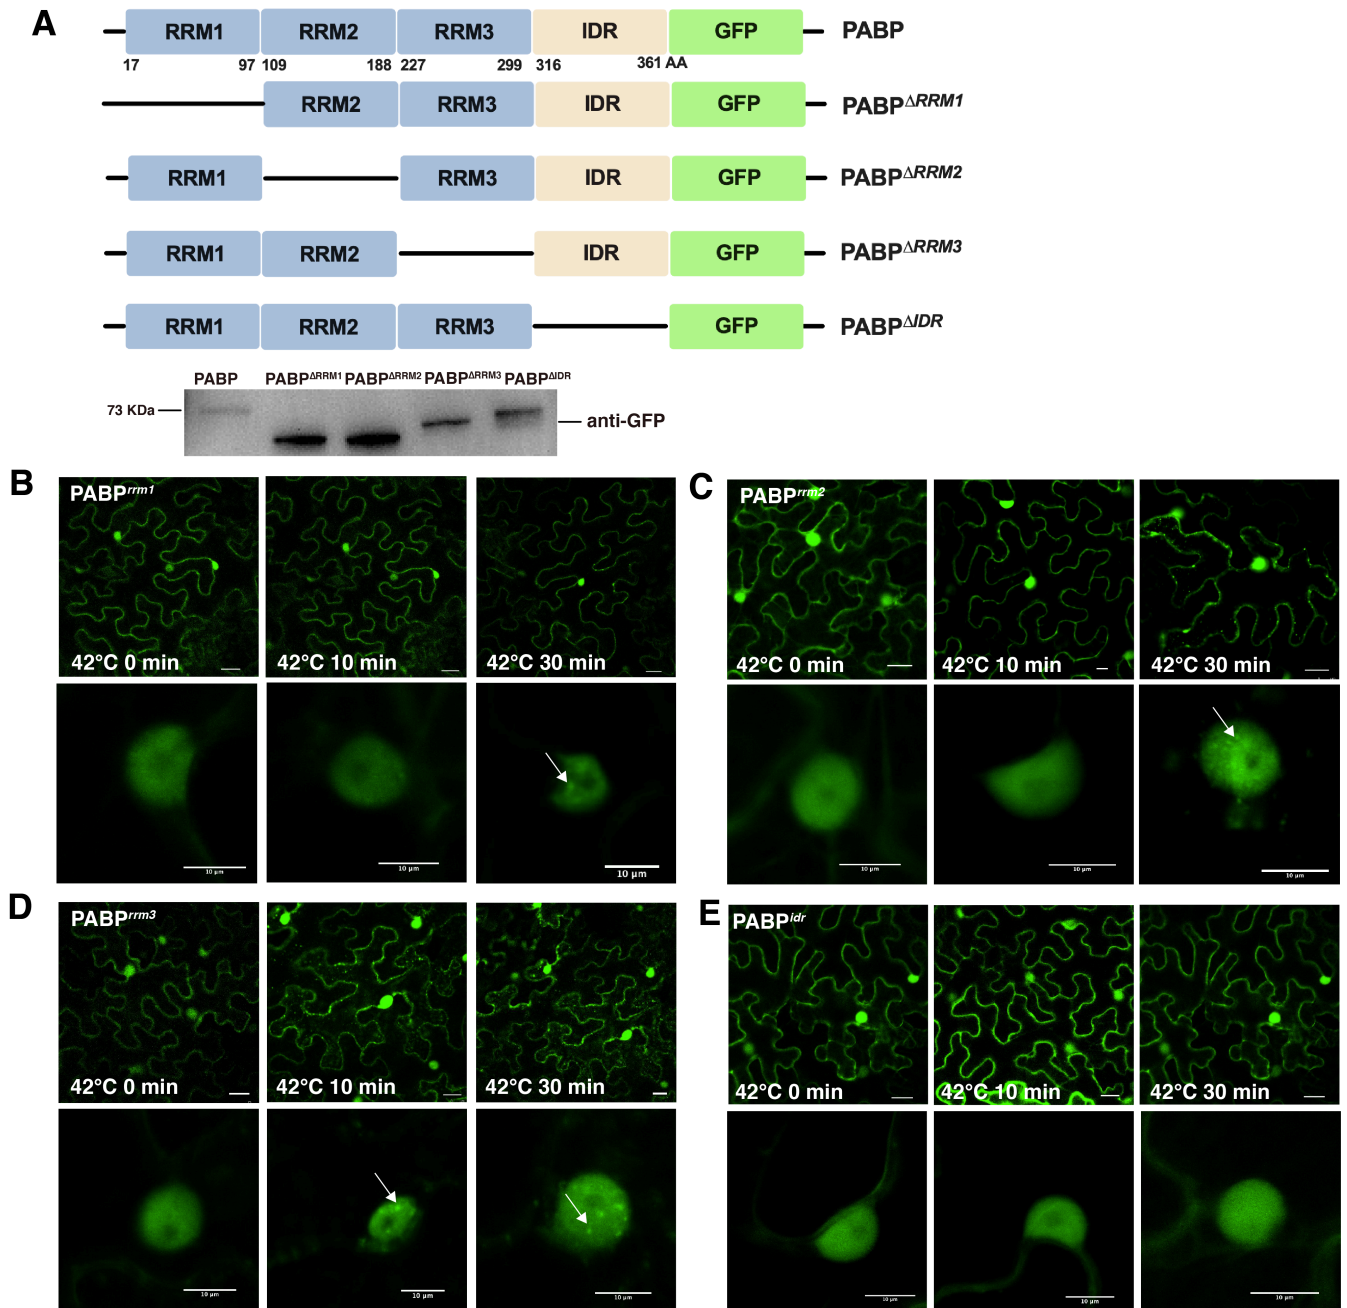

**Extended Data Fig. 4 Analysis of condensate formation by PABP truncation constructs under HS condition.**

a. Structural diagram of EGFP-tagged truncation constructs of PABP, with deletions of three RRM domains or the IDR domains (PABP $\Delta$ RRM1, PABP $\Delta$ RRM2, PABP $\Delta$ RRM3, and PABP $\Delta$ IDR). Meanwhile, western blotting was utilized to confirm the expression of EGFP-tagged truncation constructs of PABP.

b-e. EGFP-tagged PABP truncation constructs with RRM domain deletions still form condensates in both the cytoplasm and nucleus under HS condition (b-d), except for PABP $\Delta$ IDR-GFP, which shows no condensate formation (e). Scale bar = 20  $\mu$ m.
