# Supplementary material for: NAT10 recruits PABP to compartmentalize ac4C-modified mRNAs into stress granules and enhance mRNA stability during plant heat thermotolerance
Source: Research Square preprint supplement (doi:10.21203/rs.3.rs-6415425/v1), 2025-06-17
Supplement: Supplementary file 3 [file 575daeae0e4094cc3af4177f.pdf]

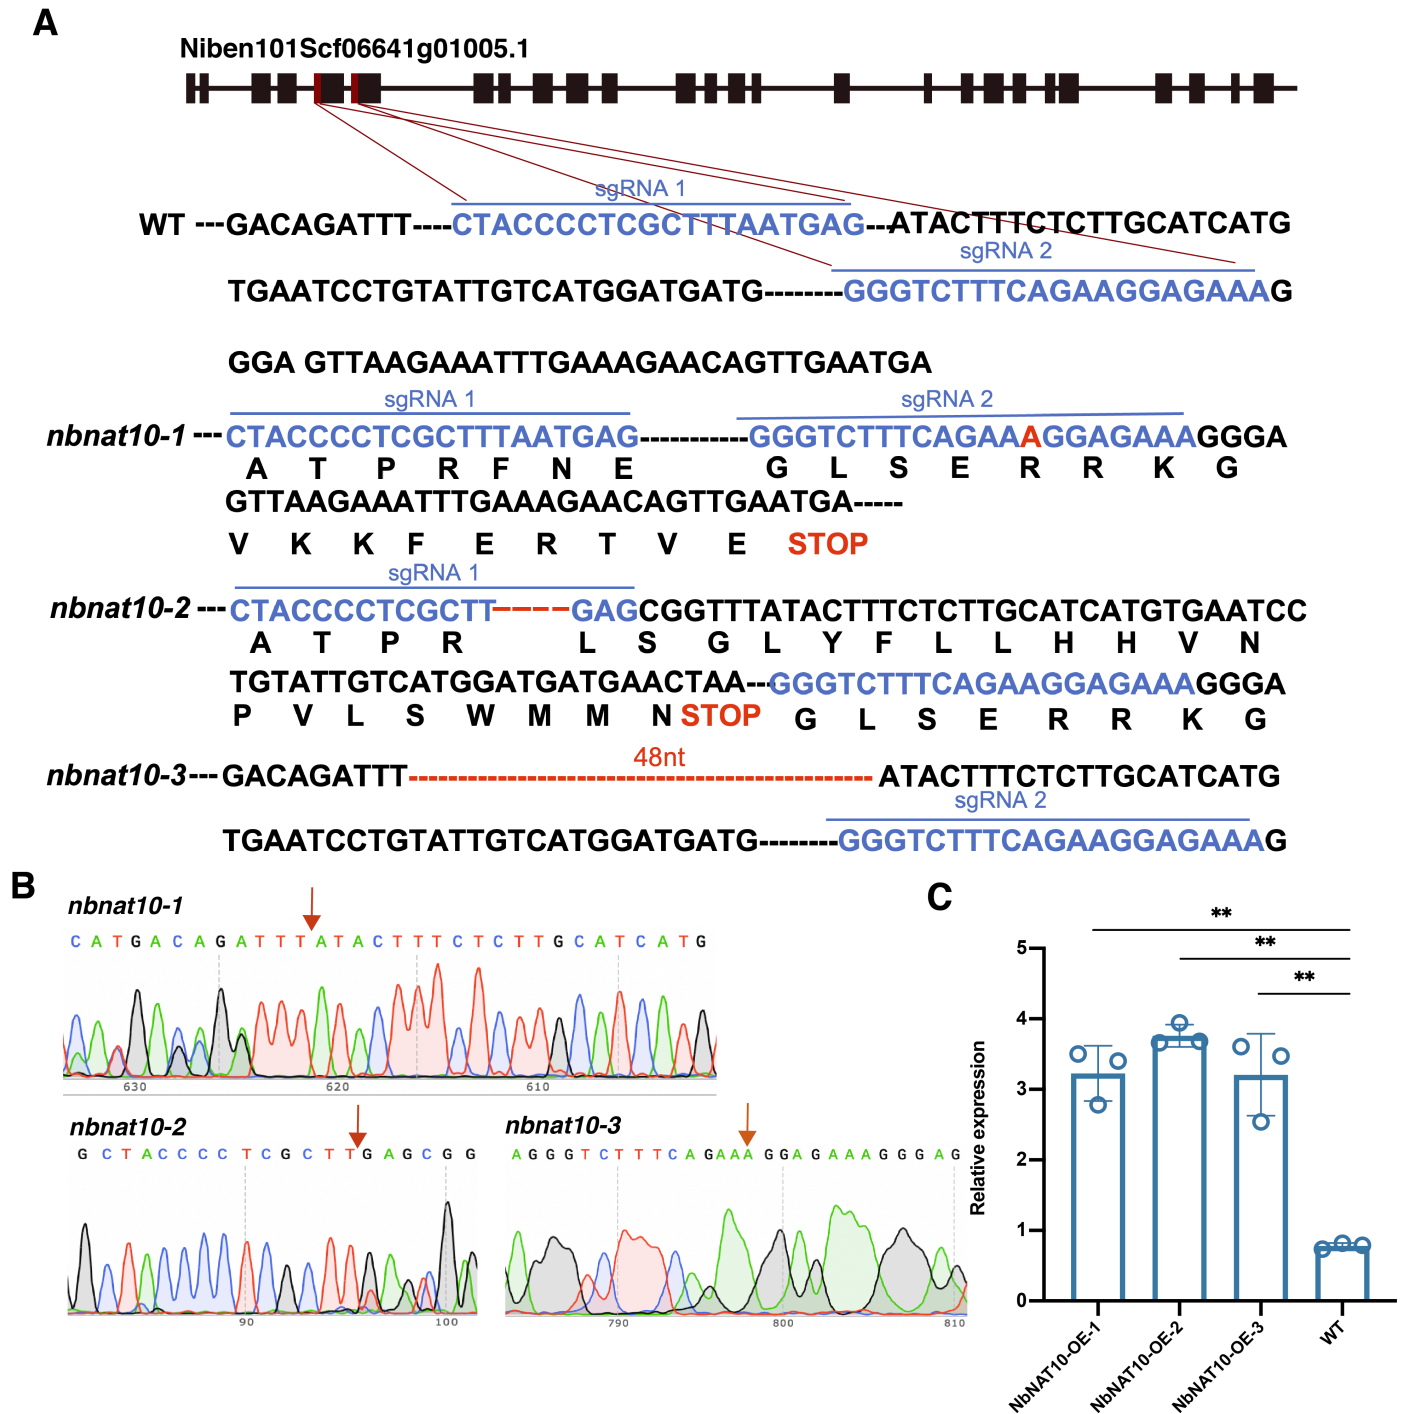

**Extended Data Fig. 1 Genotyping of *nbnat10* and NbNAT10-OE mutants.**

a. The positions of the two sgRNA target sites (T1 and T2) for CRISPR/Cas9 editing *NbNAT10*(Niben101Scf06641g01005.1) (upper panel). Black rectangles indicate exons, red rectangles indicate sgRNA target sites. DNA sequences of three independent *N. benthamiana* *nbnat10* mutant lines (lower panel). In the *nbnat10-1* mutant, an additional adenine was inserted at the sgRNA-2 target site, resulting in a frameshift mutation and the generation of a premature stop codon. The *nbnat10-2* mutant has a 4-base deletion at the sgRNA-1 target site, resulting in a frameshift mutation and a premature stop codon. The *nbnat10-3*

mutant exhibits a large 48-nt deletion at the sgRNA-1 site.

b. Sanger sequencing chromatograms of CRISPR/Cas9-targeted DNA regions in *NbNAT10* knockout lines (*nbnat10-1*, *nbnat10-2*, *nbnat10-3*). The red arrows indicate the mutation sites.

c. The relative expression levels of *NbNAT10* in WT and three independent NbNAT10-OE lines. The expression of *NbNAT10* was significantly higher in all three NbNAT10-OE lines compared to WT. Statistical analysis was performed using one-way analysis of variance (ANOVA) (\*  $p < 0.05$ , \*\*  $p < 0.01$ ). Data are means  $\pm$  standard deviation (SD) (n = 3 biological replicates).
