# Supplementary material for: NAT10 recruits PABP to compartmentalize ac4C-modified mRNAs into stress granules and enhance mRNA stability during plant heat thermotolerance
Source: Research Square preprint supplement (doi:10.21203/rs.3.rs-6415425/v1), 2025-06-17
Supplement: Supplementary file 4 [file 6207625274c432dca0ca07fe.pdf]

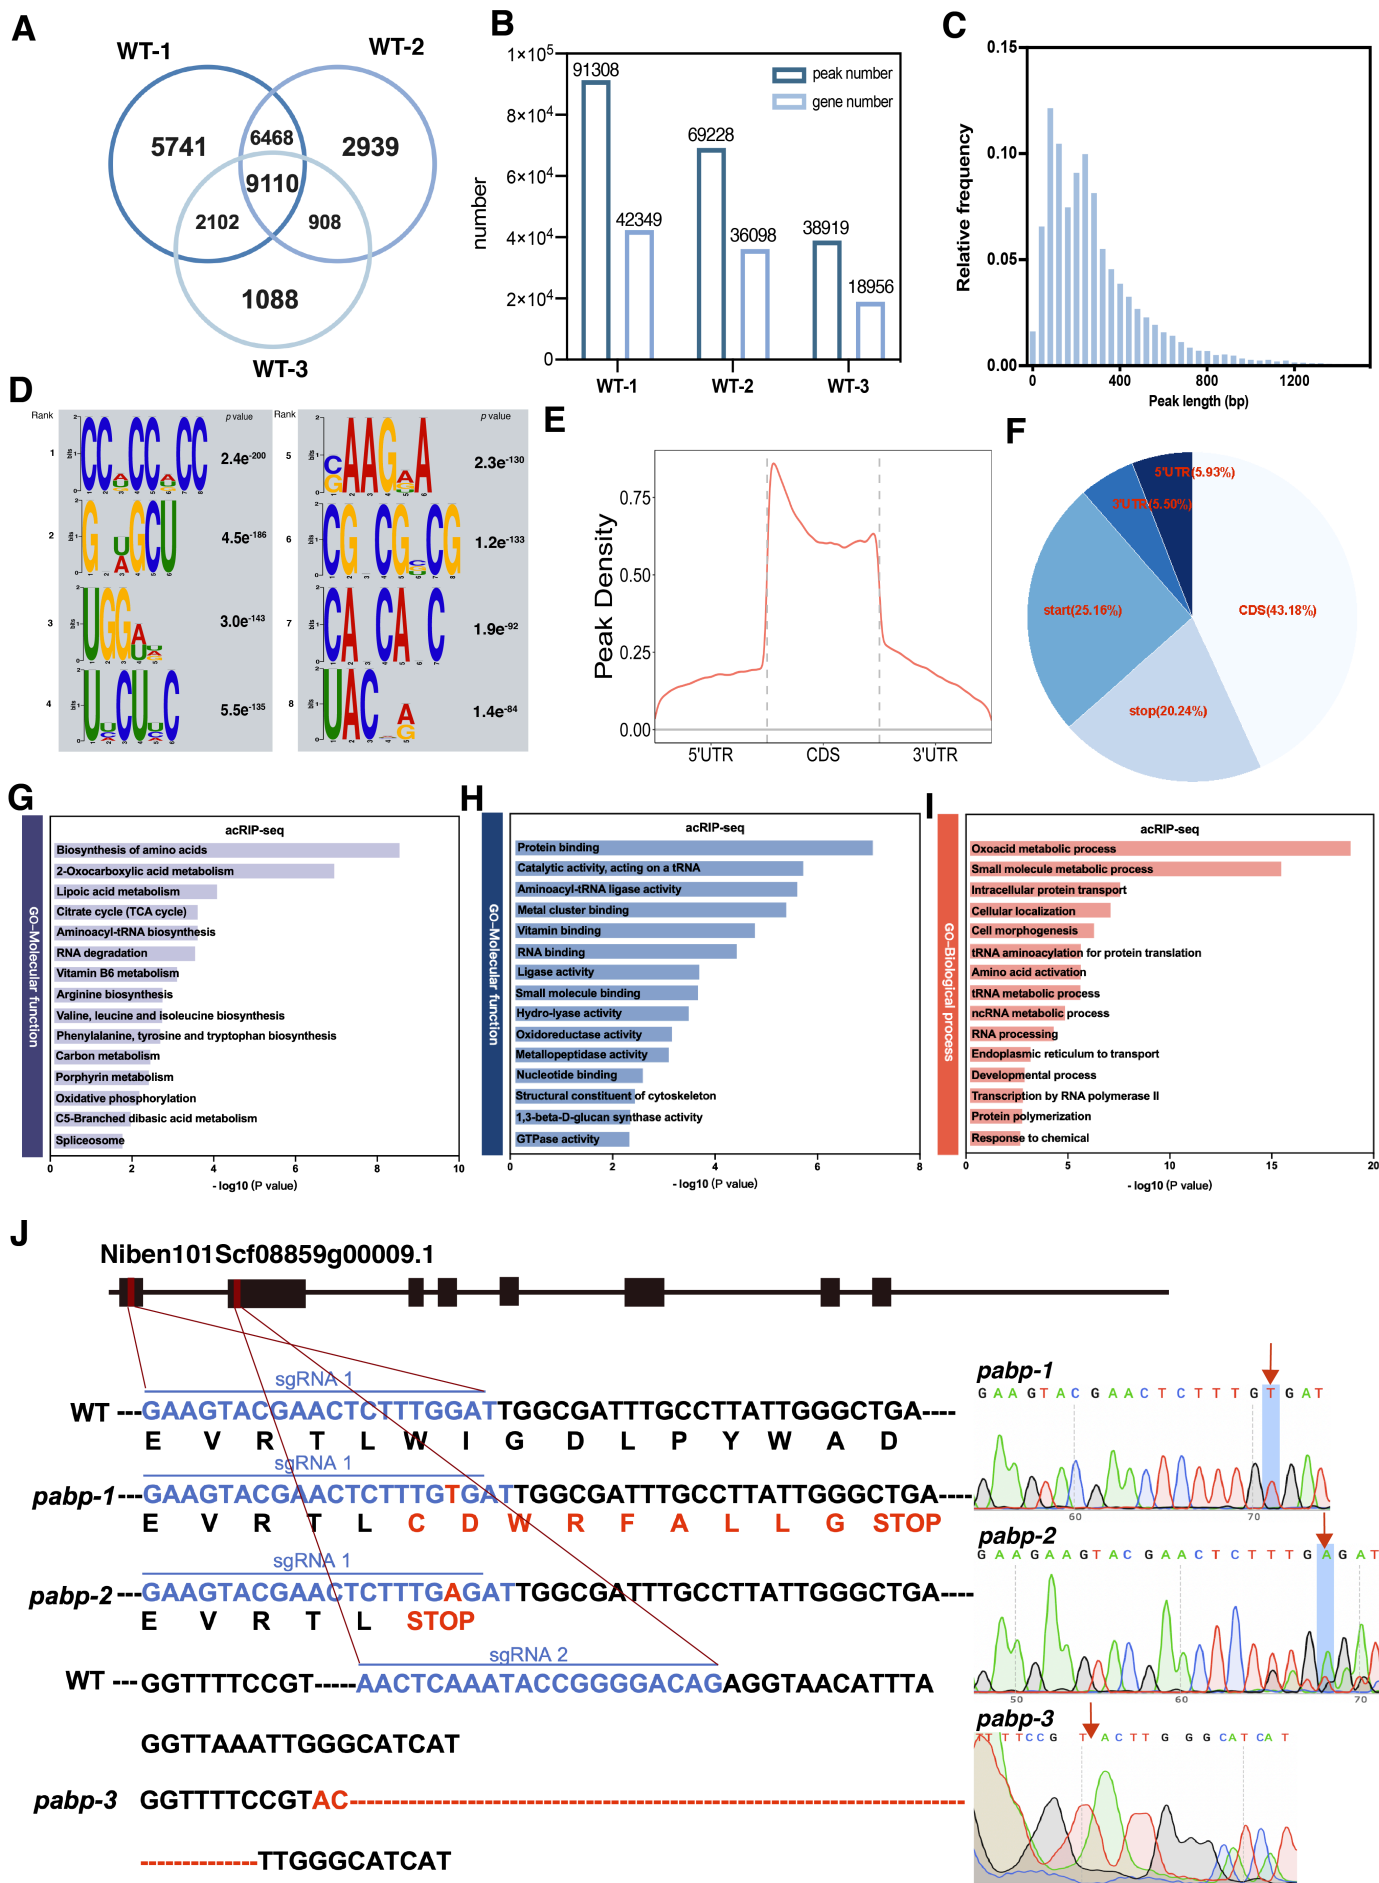

**Extended Data Fig. 6 Analysis of ac<sup>4</sup>C targets in *N. benthamiana*.**

- a. Determine of the extent of overlap between ac<sup>4</sup>C-modified genes across three biological replicates of *N. benthamiana* transcripts.
- b. The barplot is presented of the number of ac<sup>4</sup>C peaks and associated genes across the three biological replicates of *N. benthamiana* transcripts.
- c. The barplot is presented of the length distribution of ac<sup>4</sup>C peaks in associated genes.
- d. Top 8 motifs identified from ac<sup>4</sup>C-modified transcripts by acRIP-seq.
- e. The metaplot is presented of the distribution of ac<sup>4</sup>C-modified transcripts. The relative position of UTRs and CDS is shown at the bottom.
- f. Proportional distribution of ac<sup>4</sup>C-modified transcripts across different functional regions of genes.
- g. KEGG pathway analysis of ac<sup>4</sup>C-modified transcripts.
- h. GO enrichment analysis of biological processes (BP) associated with ac<sup>4</sup>C-modified transcripts.
- i. GO enrichment analysis of molecular functions (MF) associated with ac<sup>4</sup>C-modified transcripts.
- j. The positions of the two sgRNA target sites (T1 and T2) for CRISPR/Cas9 editing *PABP* (Niben101Scf08859g00009.1) (upper panel). Black rectangles indicate exons, red rectangles indicate sgRNA target sites. DNA sequences of three independent *N. benthamiana* *PABP* mutant lines (left panel). In the *pabp-1* mutant, an additional thymine was inserted at the sgRNA-1 target site, resulting in a frameshift mutation and the generation of a premature stop codon. The *pabp-2* mutant has an additional adenine was inserted at the sgRNA-1 target site, resulting in a frameshift mutation and the generation of a premature stop codon. The *nbnat10-3* mutant exhibits a large deletion at the sgRNA-2 site. Sanger sequencing chromatograms of CRISPR/Cas9-targeted DNA regions in *pabp* knockout lines (*pabp-1*, *pabp-2*, *pabp-3*). The red arrows indicate the mutation sites (right panel).
