# Supplementary material for: NAT10 recruits PABP to compartmentalize ac4C-modified mRNAs into stress granules and enhance mRNA stability during plant heat thermotolerance
Source: Research Square preprint supplement (doi:10.21203/rs.3.rs-6415425/v1), 2025-06-17
Supplement: Supplementary file 5 [file afd5de2c0ab603db97ea3014.pdf]

A

| Gene ID                         | Appearance | Annotation                                                      |
|---------------------------------|------------|-----------------------------------------------------------------|
| Niben101Scf08566g05001.1        | 3          | Serine/arginine-rich splicing factor SC35-like                  |
| Niben101Scf00691g03001.1        | 2          | Anthranilate synthase beta subunit 1                            |
| Niben101Scf04528g11009.1        | 1          | Glycine-rich RNA-binding protein                                |
| <b>Niben101Scf08859g00009.1</b> | <b>2</b>   | <b>Polyadenylate-binding protein</b>                            |
| Niben101Scf01406g03019.1        | 1          | Fructose-1,6-bisphosphatase                                     |
| Niben101Scf00132g01002.1        | 1          | RNA polymerase II transcriptional coactivator KELP              |
| Niben101Scf16657g00010.1        | 1          | Protein TIFY 10A/NtJAZ3 mRNA for jasmonate ZIM-domain protein 3 |
| Niben101Scf10448g00020.1        | 2          | Vacuolar protein sorting-associated protein 55 homolog          |

B

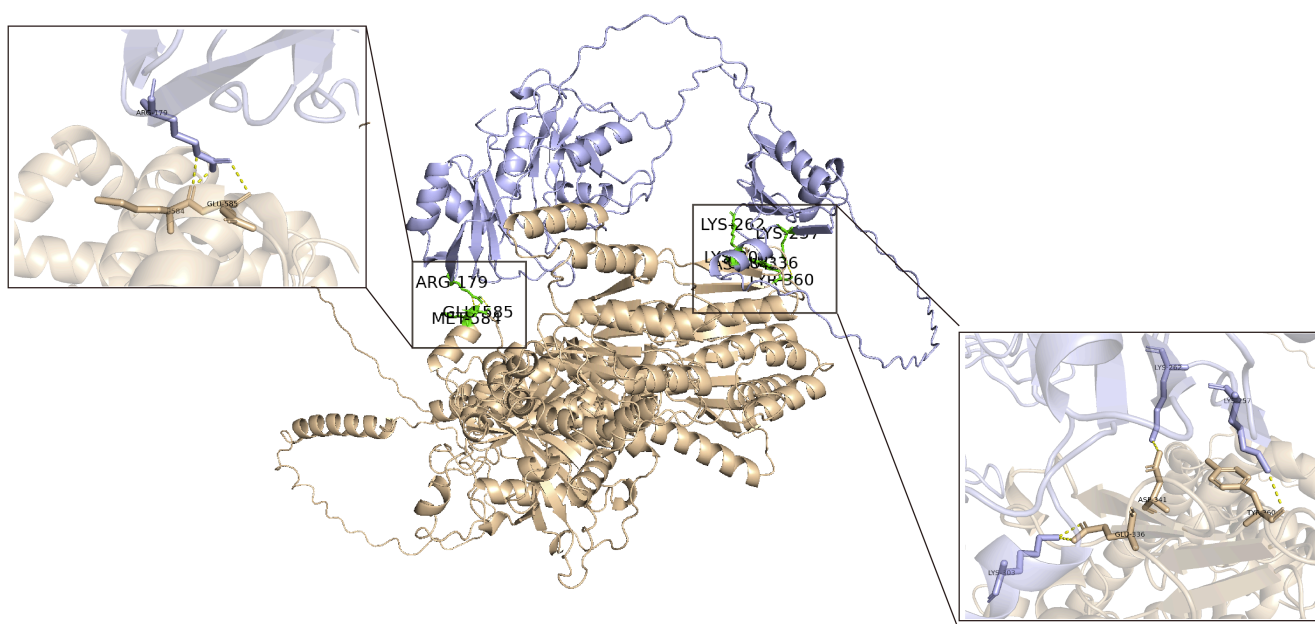

C

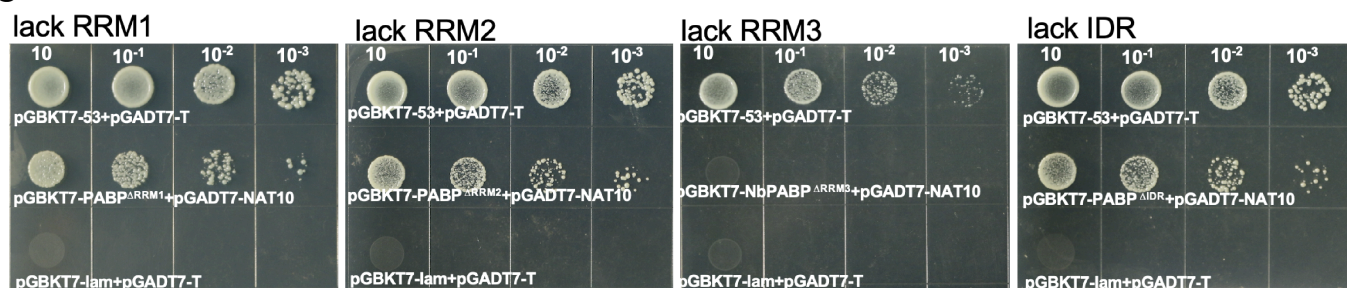

**Extended Data Fig. 2 Supporting evidence for the interaction between NbNAT10 and PABP, as a supplement to Fig. 2.**

a. The list of several potential interacting proteins was identified from the *N. benthamiana* cDNA library using yeast two-hybrid (Y2H) screening with NbNAT10 as bait.

b. Predicted interactions between PABP and NbNAT10 analyzed using AlphaFold3. The predicted model identified multiple potential binding residues between PABP (blue) and NbNAT10 (yellow) and reveals docking sites within the RNA recognition motifs (RRMs) of PABP, as delineated by red solid line boxes. The yellow dashed lines represent hydrogen bonds (<4 Å).

c. The yeast two-hybrid (Y2H) assay was utilized to ascertain the interaction between NbNAT10 and four structural domains of PABP and NbNAT10. pGBKT7-53 and pGADT7-T were employed as positive controls, while pGBKT7-lam and pGADT7-T were used as negative controls.
