# Supplementary material for: NAT10 recruits PABP to compartmentalize ac4C-modified mRNAs into stress granules and enhance mRNA stability during plant heat thermotolerance
Source: Research Square preprint supplement (doi:10.21203/rs.3.rs-6415425/v1), 2025-06-17
Supplement: Supplementary file 6 [file c12127ffc1f24615355664c8.pdf]

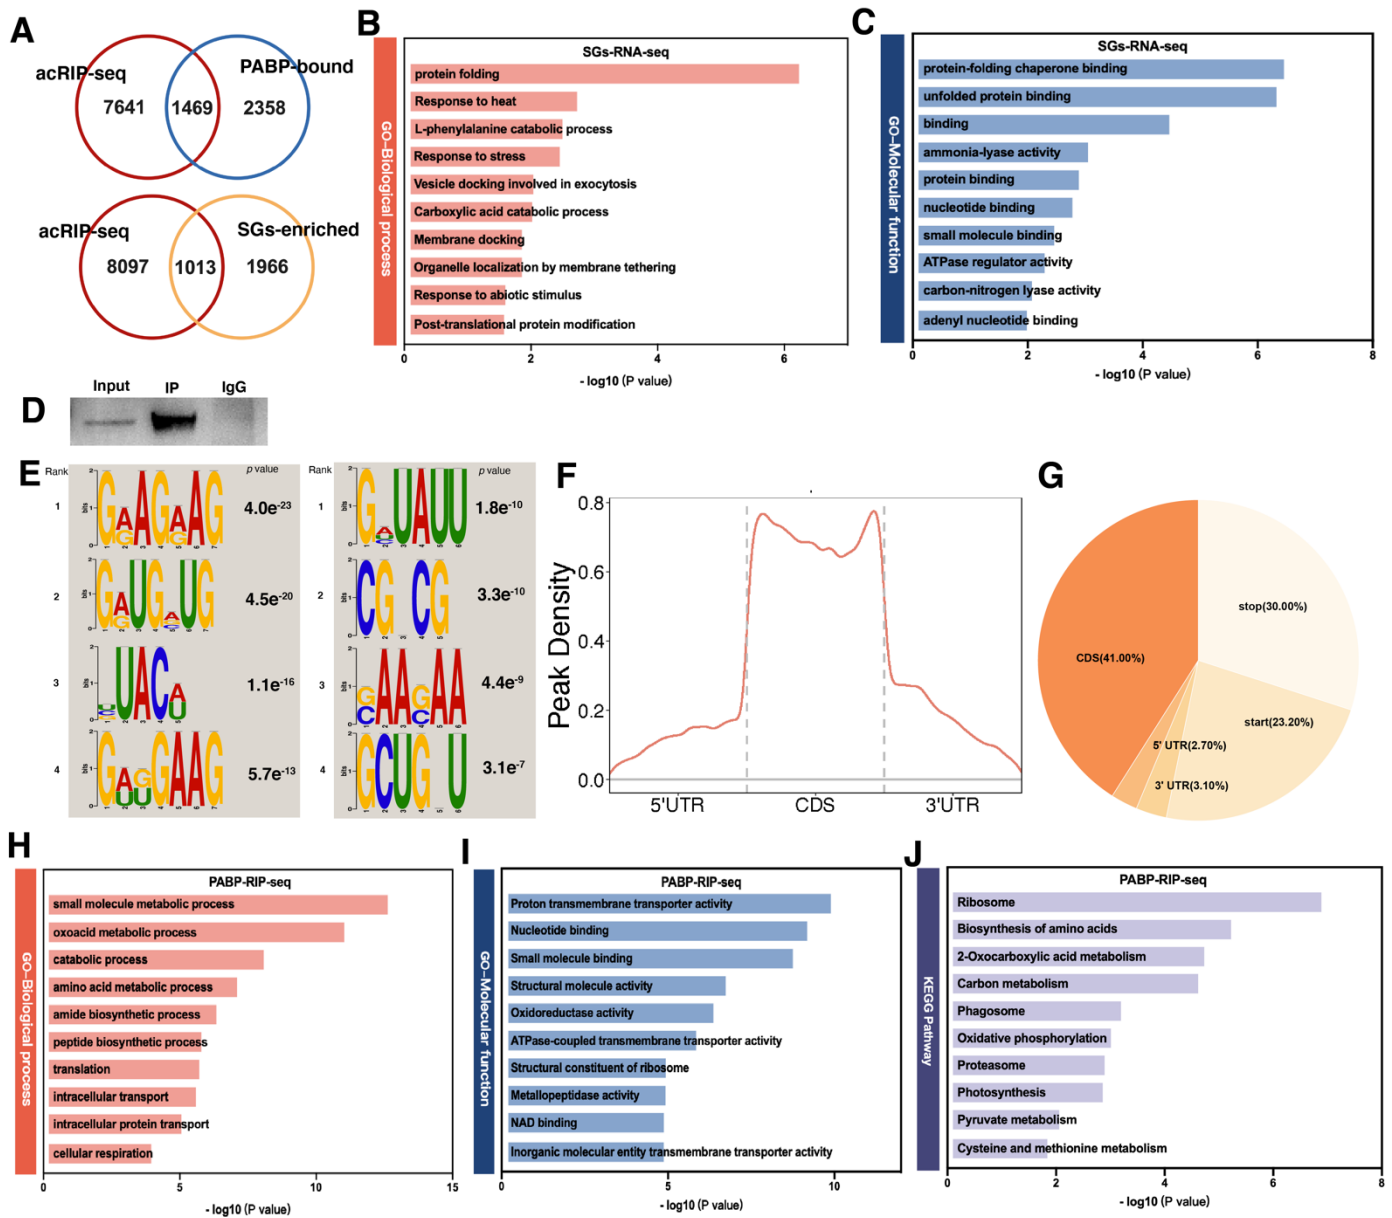

**Extended Data Fig. 5 Analysis of SGs-enriched and PABP-bound transcription.**

- Determine of the extent of overlap between ac<sup>4</sup>C-modified transcripts and PABP-bound or SG-enriched transcripts, respectively.
- Gene Ontology (GO) enrichment analysis of biological processes (BP) for SG-enriched transcripts.
- GO enrichment analysis of molecular functions (MF) for SG-enriched transcripts.
- Immunoprecipitation was performed using GFP antibody-conjugated magnetic beads on protein extracts from *N. benthamiana* overexpressing PABP-GFP, with IgG-conjugated magnetic beads as a negative control. Western blot analysis was used to assess the enrichment of the target protein in the input (Input), immunoprecipitated (IP), and control (IgG) samples.
- Top 8 motifs identified from transcripts bound by PABP in RIP-seq.

f. The metaplot is presented of the distribution of PABP-bound transcripts. The relative position of UTRs and CDS is shown at the bottom.

g. Proportional distribution of PABP-bound transcripts across different functional regions of genes.

h. GO enrichment analysis of biological processes (BP) for PABP-bound transcripts.

i. GO enrichment analysis of molecular functions (MF) for PABP-bound transcripts.

j. KEGG pathway analysis of PABP-bound transcripts.
